# Supplementary figures and images for: A case of antipsychotic-induced psychomotor seizure
Source: HighWire-hosted journal article supplement (doi:10.1136/gpsych-2021-100616), 2022-06-01

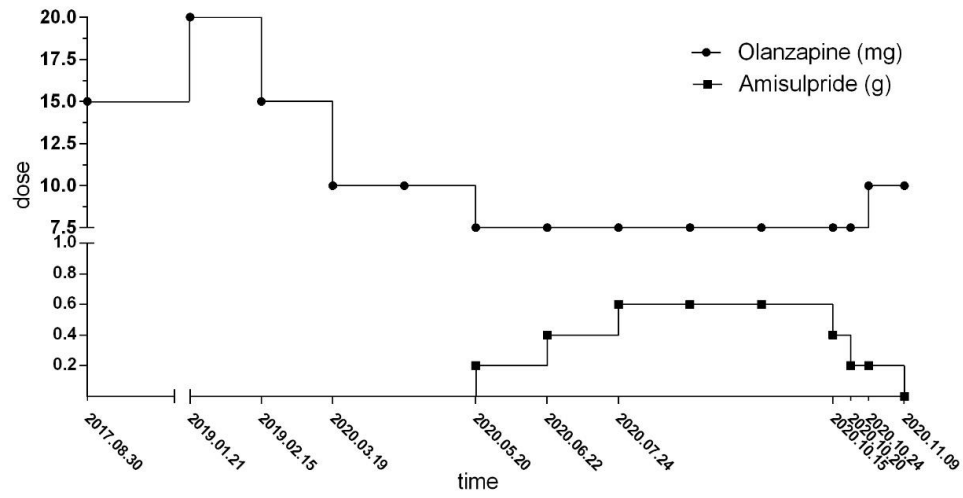

Figure 1. Drug dosage changes over a 27-month period.

Supplement: gpsych-2021-100616supp001_data_supplement.pdf [file gpsych-2021-100616supp001_data_supplement.pdf]
